# Supplementary material
Source: HighWire-hosted journal article supplement (https://nutrition.bmj.com/content/6/2/212)
Supplement: inline-supplementary-material-1 [file inline-supplementary-material-1.pdf]

Supplemental Table 1: scoring of PDI scores

| Food groups                           | Scoring for each quintile of PDIs |    |    |    |    |       |    |    |    |    |       |    |    |    |    |
|---------------------------------------|-----------------------------------|----|----|----|----|-------|----|----|----|----|-------|----|----|----|----|
|                                       | PDI                               |    |    |    |    | hPDI  |    |    |    |    | uPDI  |    |    |    |    |
|                                       | Q1                                | Q2 | Q3 | Q4 | Q5 | Q1    | Q2 | Q3 | Q4 | Q5 | Q1    | Q2 | Q3 | Q4 | Q5 |
| <b>Healthy plant food groups</b>      |                                   |    |    |    |    |       |    |    |    |    |       |    |    |    |    |
| Whole grains                          | 1                                 | 2  | 3  | 4  | 5  | 1     | 2  | 3  | 4  | 5  | 5     | 4  | 3  | 2  | 1  |
| Fruits                                | 1                                 | 2  | 3  | 4  | 5  | 1     | 2  | 3  | 4  | 5  | 5     | 4  | 3  | 2  | 1  |
| Vegetables                            | 1                                 | 2  | 3  | 4  | 5  | 1     | 2  | 3  | 4  | 5  | 5     | 4  | 3  | 2  | 1  |
| Nuts                                  | 1                                 | 2  | 3  | 4  | 5  | 1     | 2  | 3  | 4  | 5  | 5     | 4  | 3  | 2  | 1  |
| Legumes                               | 1                                 | 2  | 3  | 4  | 5  | 1     | 2  | 3  | 4  | 5  | 5     | 4  | 3  | 2  | 1  |
| Tea/coffee                            | 1                                 | 2  | 3  | 4  | 5  | 1     | 2  | 3  | 4  | 5  | 5     | 4  | 3  | 2  | 1  |
| <b>Less healthy plant food groups</b> |                                   |    |    |    |    |       |    |    |    |    |       |    |    |    |    |
| Fruit juices                          | 1                                 | 2  | 3  | 4  | 5  | 5     | 4  | 3  | 2  | 1  | 1     | 2  | 3  | 4  | 5  |
| Sugar-sweetened beverages             | 1                                 | 2  | 3  | 4  | 5  | 5     | 4  | 3  | 2  | 1  | 1     | 2  | 3  | 4  | 5  |
| Refined grains                        | 1                                 | 2  | 3  | 4  | 5  | 5     | 4  | 3  | 2  | 1  | 1     | 2  | 3  | 4  | 5  |
| Potatoes                              | 1                                 | 2  | 3  | 4  | 5  | 5     | 4  | 3  | 2  | 1  | 1     | 2  | 3  | 4  | 5  |
| Sweets/desserts                       | 1                                 | 2  | 3  | 4  | 5  | 5     | 4  | 3  | 2  | 1  | 1     | 2  | 3  | 4  | 5  |
| <b>Animal food groups</b>             |                                   |    |    |    |    |       |    |    |    |    |       |    |    |    |    |
| Animal fat (butter or lard)           | 5                                 | 4  | 3  | 2  | 1  | 5     | 4  | 3  | 2  | 1  | 5     | 4  | 3  | 2  | 1  |
| Dairy                                 | 5                                 | 4  | 3  | 2  | 1  | 5     | 4  | 3  | 2  | 1  | 5     | 4  | 3  | 2  | 1  |
| Eggs                                  | 5                                 | 4  | 3  | 2  | 1  | 5     | 4  | 3  | 2  | 1  | 5     | 4  | 3  | 2  | 1  |
| Fish/seafood                          | 5                                 | 4  | 3  | 2  | 1  | 5     | 4  | 3  | 2  | 1  | 5     | 4  | 3  | 2  | 1  |
| Meat                                  | 5                                 | 4  | 3  | 2  | 1  | 5     | 4  | 3  | 2  | 1  | 5     | 4  | 3  | 2  | 1  |
| <b>Range of scores</b>                | 16~80                             |    |    |    |    | 16~80 |    |    |    |    | 16~80 |    |    |    |    |

**Supplemental Table 2: three sampling to illustrate the PDIs scoring method**

|                                | Median Scenario Diet <sup>1</sup> |                    |                 |      |      | Participant #1     |                    |                 |      |      | Participant #2     |                    |                 |      |      |
|--------------------------------|-----------------------------------|--------------------|-----------------|------|------|--------------------|--------------------|-----------------|------|------|--------------------|--------------------|-----------------|------|------|
|                                | Intake                            |                    | Sub-Scoring for |      |      | Intake             |                    | Sub-Scoring for |      |      | Intake             |                    | Sub-Scoring for |      |      |
|                                | (s/d) <sup>2</sup>                | Ranks <sup>3</sup> | PDI             | hPDI | uPDI | (s/d) <sup>2</sup> | Ranks <sup>3</sup> | PDI             | hPDI | uPDI | (s/d) <sup>2</sup> | Ranks <sup>3</sup> | PDI             | hPDI | uPDI |
| Healthy plant food groups      |                                   |                    |                 |      |      |                    |                    |                 |      |      |                    |                    |                 |      |      |
| Whole grains                   | 0.14                              | 3                  | 3               | 3    | 3    | 0.07               | Q2                 | 2               | 2    | 4    | 0                  | Q1                 | 1               | 1    | 5    |
| Fruits                         | 0.94                              | 3                  | 3               | 3    | 3    | 0.07               | Q1                 | 1               | 1    | 5    | 0.14               | Q1                 | 1               | 1    | 5    |
| Vegetables                     | 0.99                              | 3                  | 3               | 3    | 3    | 0.42               | Q1                 | 1               | 1    | 5    | 0.07               | Q1                 | 1               | 1    | 5    |
| Nuts                           | 0.21                              | 3                  | 3               | 3    | 3    | 0.07               | Q1                 | 1               | 1    | 5    | 0                  | Q1                 | 1               | 1    | 5    |
| Legumes                        | 0.28                              | 3                  | 3               | 3    | 3    | 0.14               | Q2                 | 2               | 2    | 4    | 0                  | Q1                 | 1               | 1    | 5    |
| Tea/coffee                     | 1.0                               | 3                  | 3               | 3    | 3    | 0                  | Q1                 | 1               | 1    | 5    | 0                  | Q1                 | 1               | 1    | 5    |
| Less healthy plant food groups |                                   |                    |                 |      |      |                    |                    |                 |      |      |                    |                    |                 |      |      |
| Fruit juices                   | 0.07                              | 3                  | 3               | 3    | 3    | 0                  | Q1                 | 1               | 5    | 1    | 0.14               | Q4                 | 4               | 2    | 4    |
| Sugar-sweetened beverages      | 0.14                              | 3                  | 3               | 3    | 3    | 0                  | Q1                 | 1               | 5    | 1    | 0.07               | Q3                 | 3               | 3    | 3    |
| Refined grains                 | 0.64                              | 3                  | 3               | 3    | 3    | 1.3                | Q5                 | 5               | 1    | 5    | 0                  | Q1                 | 1               | 5    | 1    |
| Potatoes                       | 0.35                              | 3                  | 3               | 3    | 3    | 1.37               | Q5                 | 5               | 1    | 5    | 1.74               | Q5                 | 5               | 1    | 5    |
| Sweets/desserts                | 0.43                              | 3                  | 3               | 3    | 3    | 0.35               | Q2                 | 2               | 4    | 2    | 1.37               | Q5                 | 5               | 1    | 5    |
| Animal food groups             |                                   |                    |                 |      |      |                    |                    |                 |      |      |                    |                    |                 |      |      |
| Animal fat (butter or lard)    | 0.14                              | 3                  | 3               | 3    | 3    | 0                  | Q1                 | 5               | 5    | 5    | 0.07               | Q2                 | 4               | 4    | 4    |
| Dairy                          | 1.22                              | 3                  | 3               | 3    | 3    | 0                  | Q1                 | 5               | 5    | 5    | 0.35               | Q1                 | 5               | 5    | 5    |
| Eggs                           | 0.43                              | 3                  | 3               | 3    | 3    | 0                  | Q1                 | 5               | 5    | 5    | 1                  | Q5                 | 1               | 1    | 1    |
| Fish/seafood                   | 0.07                              | 3                  | 3               | 3    | 3    | 0                  | Q1                 | 5               | 5    | 5    | 0                  | Q1                 | 5               | 5    | 5    |
| Meat                           | 1.42                              | 3                  | 3               | 3    | 3    | 0                  | Q1                 | 5               | 5    | 5    | 2.38               | Q5                 | 1               | 1    | 1    |
| Total PDIs scores <sup>4</sup> |                                   |                    | 48              | 48   | 48   |                    |                    | 47              | 49   | 67   |                    |                    | 40              | 34   | 64   |
|                                |                                   |                    | PDI             | hPDI | uPDI |                    |                    | PDI             | hPDI | uPDI |                    |                    | PDI             | hPDI | uPDI |

<sup>1</sup>Median Scenario Diet is based on the dietary intakes were the median value of all food group, as a representative of the study population, dietary intakes of Participants #1 and #2 were from the real data of MVP.

<sup>2</sup>s/d: serving per day of each food group intake.

<sup>3</sup>#: quintile number of the quintile distribution of the study population.

<sup>4</sup>sum of all sub-scores of the 16 food groups
